# Supplementary material for: Student Interpretations of Phylogenetic Trees in an Introductory Biology Course
Source: PubMed Central journal article supplement — CBE Life Sci Educ. 2014 Winter;13(4):666–76. doi: 10.1187/cbe.14-01-0003 (PMC4255353; doi:10.1187/cbe.14-01-0003), 2014
Supplement: supp_13.4.666_CombinedSupMats.pdf [file supp_13.4.666_CombinedSupMats.pdf]

# Supplemental Material

*CBE—Life Sciences Education*

Dees *et al.*

### Appendix: Taxa Relatedness Reasoning Rubric

| Category                                                                                                              | Brief Description, References, and Student-Generated Example                                                                                                                                                                                                                                                                                                     |
|-----------------------------------------------------------------------------------------------------------------------|------------------------------------------------------------------------------------------------------------------------------------------------------------------------------------------------------------------------------------------------------------------------------------------------------------------------------------------------------------------|
| <i>Most Recent Common Ancestry</i>                                                                                    | <i>Taxa sharing a more recent common ancestor are more closely related to each other than to another taxon.</i> <sup>a, b, c, e, f, h, i, l, m, o, q, r</sup><br>Example: “Lizards share the same most recent common ancestor with both birds and crocodiles” (Figure S3).                                                                                       |
| <i>Monophyletic Grouping</i>                                                                                          | <i>Taxa in the same monophyletic group are more closely related to each other than to a taxon outside of the monophyletic group.</i> <sup>d, e, f, l</sup><br>Example: “The bear is in the same monophyletic group as the sea lion and the seal, thus possessing more of a close relationship” (Figure S1).                                                      |
| Counting Nodes                                                                                                        | Taxa relatedness is determined by counting nodes or branches between taxa on phylogenetic trees. <sup>d, e, f, g, h, m, p</sup><br>Example: “Lizards and birds have less nodes between them than the lizards and crocodiles do” (Figure S3).                                                                                                                     |
| Counting Synapomorphies                                                                                               | Taxa relatedness is determined by counting synapomorphies between taxa on phylogenetic trees.<br>Example: “Bears have only one trait different with sea lions and two traits that differ with cats” (Figure S1).                                                                                                                                                 |
| Branch Tip Proximity                                                                                                  | Taxa relatedness is determined by perceived distance between taxa on phylogenetic trees. <sup>a, b, d, e, f, g, h, l, m, n, p, q</sup><br>Example: “The salamander is much closer to the alligator than a red kangaroo on the tree” (Figure 3).                                                                                                                  |
| Contemporary Descent                                                                                                  | Taxa relatedness is determined by indicating a taxon is descended from another extant taxon. <sup>a, b, d, e, f, g, h, j, l, o, p</sup><br>Example: “The sea lion branches off from bears, and the cat is on a totally different branch” (Figure S1).                                                                                                            |
| External Insights                                                                                                     | Taxa relatedness is determined by knowledge which is not provided by phylogenetic trees. <sup>a, b, d, e, f, j, k, m, r</sup><br>Example: “The alligators and salamanders are more closely related in characteristics, habitat, geographic location, and behavior” (Figure 3).                                                                                   |
| Negation Reasoning <sup>#</sup>                                                                                       | Reasoning includes description of how not to interpret taxa relatedness on phylogenetic trees (concurrent with other reasoning in all cases).<br>Example: “A bear and a sea lion have a more recent common ancestor [most recent common ancestry], and you must not pay attention to the tree top because branches can rotate [negation reasoning]” (Figure S1). |
| Other Responses                                                                                                       | Reasoning did not conclusively fall into any of the above categories.<br>Example: “Lizards and birds share a node” (Figure S3).                                                                                                                                                                                                                                  |
| <i>Italics indicate correct forms of reasoning.</i> <sup>#</sup> Negation reasoning is neither correct nor incorrect. |                                                                                                                                                                                                                                                                                                                                                                  |

<sup>a</sup>Baum *et al.*, 2005; <sup>b</sup>Baum and Offner, 2008; <sup>c</sup>College Board, 2012; <sup>d</sup>Gregory, 2008; <sup>e</sup>Halverson, 2011; <sup>f</sup>Halverson *et al.*, 2011; <sup>g</sup>Meir *et al.*, 2007; <sup>h</sup>Meisel, 2010; <sup>i</sup>Morabito *et al.*, 2010; <sup>j</sup>Novick and Catley, 2007; <sup>k</sup>Novick *et al.*, 2010; <sup>l</sup>Novick *et al.*, 2011; <sup>m</sup>Novick and Catley, 2013; <sup>n</sup>Novick *et al.*, 2012; <sup>o</sup>Omland *et al.*, 2008; <sup>p</sup>Perry *et al.*, 2008; <sup>q</sup>Sandvik, 2008; <sup>r</sup>Smith *et al.*, 2013.

## Supplemental Materials

In addition to the initial homework prompt (Figure 3), the following phylogenetic trees and taxa relatedness questions were placed on subsequent assessments throughout the course.

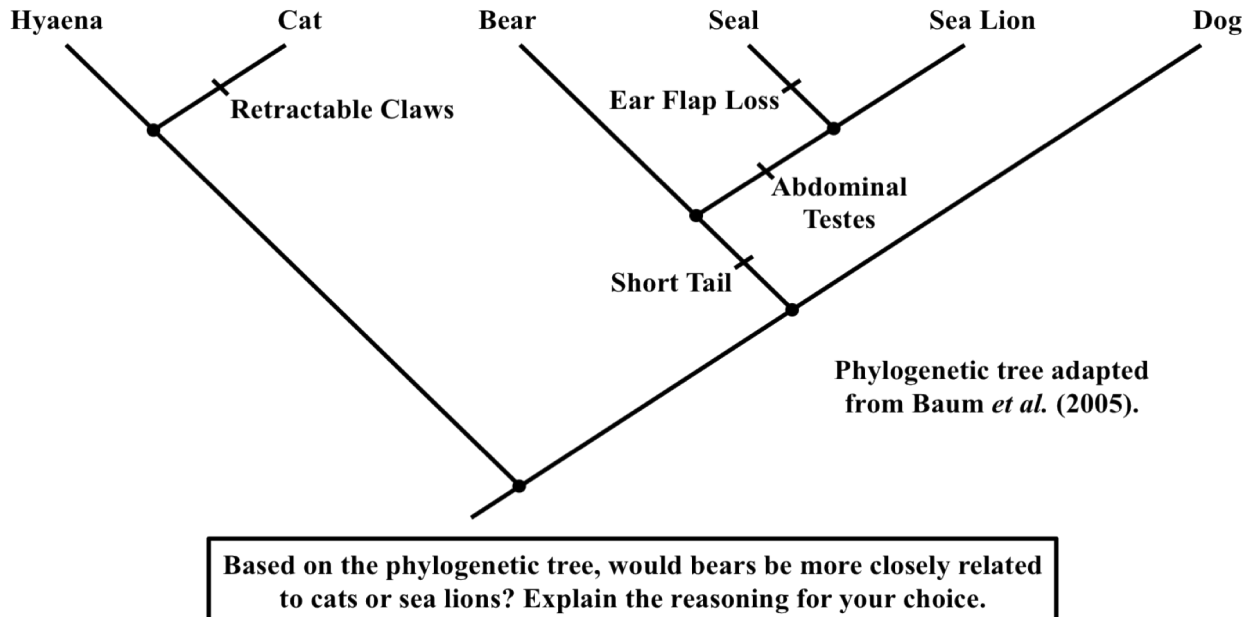

**Figure S1.** Phylogenetic tree and taxa relatedness question from the individual component of the evolution unit exam. This prompt is flawed and should not be used for measuring understanding of taxa relatedness on phylogenetic trees (see Discussion).

Use the morphological traits shown in Table A to construct a basic phylogenetic tree for plants (any style of phylogenetic tree is fine). Be sure to clearly label all synapomorphies.

Table A. Morphological traits of plants (X = trait possessed by plant).

|        |         | Plants    |             |            |        |             |              |
|--------|---------|-----------|-------------|------------|--------|-------------|--------------|
|        |         | Lady Fern | Durum Wheat | Liverworts | Ginkgo | Green Algae | White Spruce |
| Traits | Seeds   |           | X           |            | X      |             | X            |
|        | Needles |           |             |            |        |             | X            |
|        | Cuticle | X         | X           | X          | X      |             | X            |
|        | Flowers |           | X           |            |        |             |              |
|        | Stomata | X         | X           |            | X      |             | X            |
|        | Cones   |           |             |            | X      |             | X            |

Based on the phylogenetic tree of plants you created, would lady ferns be more closely related to liverworts or durum wheat? Explain the reasoning for your choice.

**Figure S2.** Phylogenetic tree construction exercise and taxa relatedness question from the group component of the evolution unit exam. This was the only prompt that required students to build a phylogenetic tree from provided data before answering the taxa relatedness question.

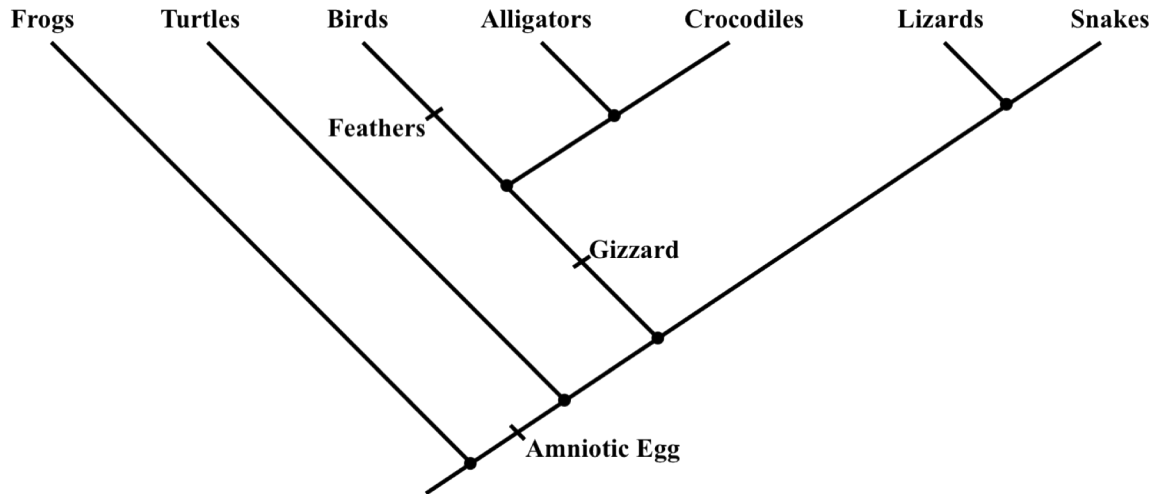

According to the phylogenetic tree, how would you describe the relatedness of lizards to crocodiles and birds? Explain the reasoning for your choice.

(a) Lizards are more closely related to crocodiles than birds.  
 (b) Lizards are more closely related to birds than crocodiles.  
 (c) Lizards are equally related to crocodiles and birds.  
 (d) Lizards are not related to crocodiles and birds.

**Figure S3.** Phylogenetic tree and taxa relatedness question from a review homework completed by individuals in preparation for the comprehensive final exam.

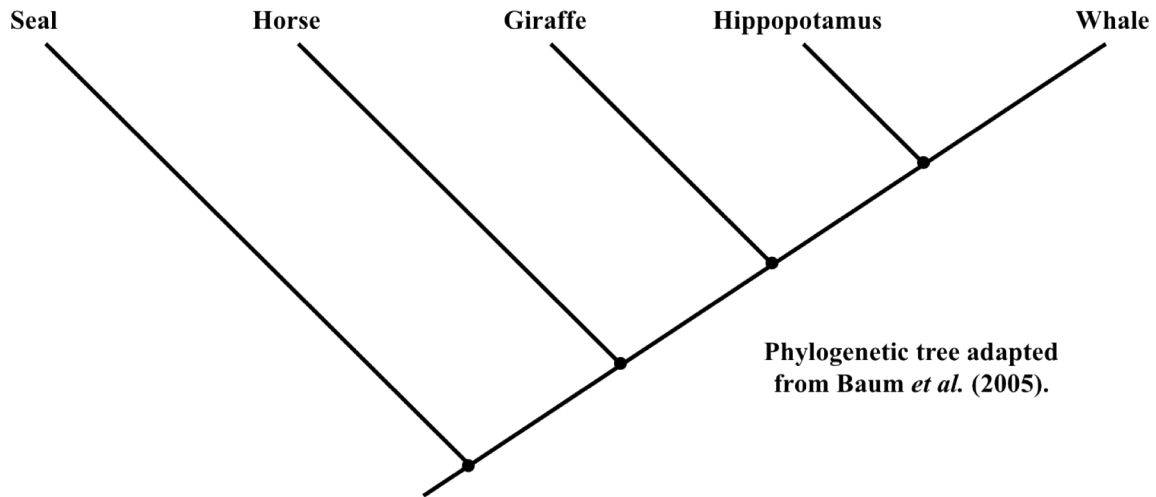

Phylogenetic tree adapted from Baum *et al.* (2005).

According to the phylogenetic tree, how would you describe the relatedness of seals to horses and whales? Explain the reasoning for your choice.

(a) Seals are more closely related to horses than whales.  
 (b) Seals are more closely related to whales than horses.  
 (c) Seals are equally related to horses and whales.  
 (d) Seals are not related to horses and whales.

**Figure S4.** Phylogenetic tree and taxa relatedness question from the individual component of the comprehensive final exam. This was the only phylogenetic tree without labeled synapomorphies.

*The GLIMMIX Procedure*

| Model Information          |                       |
|----------------------------|-----------------------|
| Data Set                   | WORK.GROUP            |
| Response Variable          | reasoning             |
| Response Distribution      | Multinomial (ordered) |
| Link Function              | Cumulative Logit      |
| Variance Function          | Default               |
| Variance Matrix Blocked By | id                    |
| Estimation Technique       | Residual PL           |
| Degrees of Freedom Method  | Containment           |

| Class Level Information |        |                   |
|-------------------------|--------|-------------------|
| Class                   | Levels | Values            |
| assessment              | 2      | homework unitexam |

|                             |    |
|-----------------------------|----|
| Number of Observations Read | 47 |
| Number of Observations Used | 47 |

| Response Profile                                                                                                                             |           |                 |
|----------------------------------------------------------------------------------------------------------------------------------------------|-----------|-----------------|
| Ordered Value                                                                                                                                | reasoning | Total Frequency |
| 1                                                                                                                                            | Incorrec  | 25              |
| 2                                                                                                                                            | DMixed    | 7               |
| 3                                                                                                                                            | Correct   | 15              |
| <p>The GLIMMIX procedure is modeling the probabilities of levels of reasoning having lower Ordered Values in the Response Profile table.</p> |           |                 |

| Dimensions               |    |
|--------------------------|----|
| G-side Cov. Parameters   | 1  |
| Columns in X             | 4  |
| Columns in Z per Subject | 1  |
| Subjects (Blocks in V)   | 24 |
| Max Obs per Subject      | 2  |

*The GLIMMIX Procedure*

| Optimization Information   |                   |
|----------------------------|-------------------|
| Optimization Technique     | Dual Quasi-Newton |
| Parameters in Optimization | 1                 |
| Lower Boundaries           | 1                 |
| Upper Boundaries           | 0                 |
| Fixed Effects              | Profiled          |
| Starting From              | Data              |

| Iteration History |          |               |                    |            |              |
|-------------------|----------|---------------|--------------------|------------|--------------|
| Iteration         | Restarts | Subiterations | Objective Function | Change     | Max Gradient |
| 0                 | 0        | 2             | 315.71123579       | 2.00000000 | 1.625119     |
| 1                 | 0        | 0             | 371.82915586       | 0.09039772 | 0.496325     |
| 2                 | 0        | 2             | 402.15449412       | 2.00000000 | 2.356E-6     |
| 3                 | 0        | 2             | 404.79415271       | 0.92138663 | 4.59E-6      |
| 4                 | 0        | 2             | 403.27564941       | 0.16306621 | 2.232E-7     |
| 5                 | 0        | 1             | 403.04953351       | 0.06319160 | 8.595E-6     |
| 6                 | 0        | 1             | 402.90833066       | 0.02119695 | 1.047E-6     |
| 7                 | 0        | 1             | 402.86471333       | 0.00793665 | 1.509E-7     |
| 8                 | 0        | 1             | 402.84715031       | 0.00288865 | 2.035E-8     |
| 9                 | 0        | 1             | 402.8408718        | 0.00107119 | 3.143E-9     |
| 10                | 0        | 1             | 402.83851465       | 0.00039502 | 5.72E-10     |
| 11                | 0        | 1             | 402.83764851       | 0.00014613 | 1.939E-9     |
| 12                | 0        | 0             | 402.83732742       | 0.00000059 | 6.842E-6     |
| 13                | 0        | 0             | 402.83738859       | 0.00000001 | 7.672E-6     |
| 14                | 0        | 0             | 402.83738661       | 0.00000000 | 7.643E-6     |

Convergence criterion (PCONV=1.11022E-8) satisfied.

| Fit Statistics               |        |
|------------------------------|--------|
| -2 Res Log Pseudo-Likelihood | 402.84 |

*The GLIMMIX Procedure*

| Covariance Parameter Estimates |         |          |                |
|--------------------------------|---------|----------|----------------|
| Cov Parm                       | Subject | Estimate | Standard Error |
| Intercept                      | id      | 0.05450  | 0.9277         |

| Solutions for Fixed Effects |           |            |          |                |    |         |         |       |         |         |
|-----------------------------|-----------|------------|----------|----------------|----|---------|---------|-------|---------|---------|
| Effect                      | reasoning | assessment | Estimate | Standard Error | DF | t Value | Pr >  t | Alpha | Lower   | Upper   |
| Intercept                   | Incorrec  |            | -1.7734  | 0.5673         | 23 | -3.13   | 0.0047  | 0.05  | -2.9470 | -0.5998 |
| Intercept                   | DMixed    |            | -0.4693  | 0.4294         | 23 | -1.09   | 0.2857  | 0.05  | -1.3575 | 0.4189  |
| assessment                  |           | homework   | 4.1505   | 0.9194         | 21 | 4.51    | 0.0002  | 0.05  | 2.2384  | 6.0626  |
| assessment                  |           | unitexam   | 0        | .              | .  | .       | .       | .     | .       | .       |

| Odds Ratio Estimates |             |          |    |                       |         |
|----------------------|-------------|----------|----|-----------------------|---------|
| assessment           | _assessment | Estimate | DF | 95% Confidence Limits |         |
| homework             | unitexam    | 63.463   | 21 | 9.378                 | 429.471 |

| Type III Tests of Fixed Effects |        |        |         |        |
|---------------------------------|--------|--------|---------|--------|
| Effect                          | Num DF | Den DF | F Value | Pr > F |
| assessment                      | 1      | 21     | 20.38   | 0.0002 |

**The GLIMMIX Procedure**

| Model Information          |                       |
|----------------------------|-----------------------|
| Data Set                   | WORK.STUDENT          |
| Response Variable          | reasoning             |
| Response Distribution      | Multinomial (ordered) |
| Link Function              | Cumulative Logit      |
| Variance Function          | Default               |
| Variance Matrix Blocked By | id                    |
| Estimation Technique       | Residual PL           |
| Degrees of Freedom Method  | Containment           |

| Class Level Information |        |                                                   |
|-------------------------|--------|---------------------------------------------------|
| Class                   | Levels | Values                                            |
| assessment              | 3      | finalexa homework unitexam                        |
| class                   | 4      | Freshman Junior Senior Sophomor                   |
| major                   | 6      | Agricult Biologic Natural Other Pre-Prof Undeclar |

|                             |     |
|-----------------------------|-----|
| Number of Observations Read | 231 |
| Number of Observations Used | 231 |

| Response Profile                                                                                                                             |           |                 |
|----------------------------------------------------------------------------------------------------------------------------------------------|-----------|-----------------|
| Ordered Value                                                                                                                                | reasoning | Total Frequency |
| 1                                                                                                                                            | Correct   | 133             |
| 2                                                                                                                                            | DMixed    | 31              |
| 3                                                                                                                                            | Incorrec  | 67              |
| <p>The GLIMMIX procedure is modeling the probabilities of levels of reasoning having lower Ordered Values in the Response Profile table.</p> |           |                 |



*The GLIMMIX Procedure*

| Dimensions               |    |
|--------------------------|----|
| G-side Cov. Parameters   | 1  |
| Columns in X             | 16 |
| Columns in Z per Subject | 1  |
| Subjects (Blocks in V)   | 88 |
| Max Obs per Subject      | 3  |

| Optimization Information   |                   |
|----------------------------|-------------------|
| Optimization Technique     | Dual Quasi-Newton |
| Parameters in Optimization | 1                 |
| Lower Boundaries           | 1                 |
| Upper Boundaries           | 0                 |
| Fixed Effects              | Profiled          |
| Starting From              | Data              |

| Iteration History |          |               |                    |            |              |
|-------------------|----------|---------------|--------------------|------------|--------------|
| Iteration         | Restarts | Subiterations | Objective Function | Change     | Max Gradient |
| 0                 | 0        | 4             | 1424.8952227       | 0.95590583 | 0.000015     |
| 1                 | 0        | 4             | 1435.5338276       | 0.27730906 | 7.583E-7     |
| 2                 | 0        | 3             | 1441.7759352       | 0.35096484 | 0.000198     |
| 3                 | 0        | 2             | 1443.5191512       | 0.11395350 | 0.000032     |
| 4                 | 0        | 3             | 1444.1568332       | 0.05331046 | 1.665E-7     |
| 5                 | 0        | 2             | 1444.351661        | 0.01542820 | 9.549E-6     |
| 6                 | 0        | 2             | 1444.4169129       | 0.00566471 | 1.016E-6     |
| 7                 | 0        | 2             | 1444.4376057       | 0.00170900 | 1.051E-7     |
| 8                 | 0        | 2             | 1444.4443734       | 0.00058293 | 1.109E-8     |
| 9                 | 0        | 1             | 1444.44655         | 0.00019553 | 0.000108     |
| 10                | 0        | 1             | 1444.4475196       | 0.00006731 | 0.000017     |
| 11                | 0        | 1             | 1444.4475435       | 0.00000412 | 0.000011     |
| 12                | 0        | 0             | 1444.4475977       | 0.00000563 | 5.407E-6     |
| 13                | 0        | 0             | 1444.4476114       | 0.00000056 | 4.549E-6     |
| 14                | 0        | 0             | 1444.4476113       | 0.00000012 | 4.514E-6     |
| 15                | 0        | 0             | 1444.4476115       | 0.00000001 | 4.501E-6     |

*The GLIMMIX Procedure*

Convergence criterion (PCONV=1.11022E-8) satisfied.

| Fit Statistics               |         |
|------------------------------|---------|
| -2 Res Log Pseudo-Likelihood | 1444.45 |

| Covariance Parameter Estimates |         |          |                |
|--------------------------------|---------|----------|----------------|
| Cov Parm                       | Subject | Estimate | Standard Error |
| Intercept                      | id      | 0.6030   | 0.3523         |

## The GLIMMIX Procedure

| Solutions for Fixed Effects |           |            |          |          |          |                |     |         |         |       |
|-----------------------------|-----------|------------|----------|----------|----------|----------------|-----|---------|---------|-------|
| Effect                      | reasoning | assessment | class    | major    | Estimate | Standard Error | DF  | t Value | Pr >  t | Alpha |
| Intercept                   | Correct   |            |          |          | -0.8060  | 1.0978         | 78  | -0.73   | 0.4650  | 0.05  |
| Intercept                   | DMixed    |            |          |          | -0.1093  | 1.0962         | 78  | -0.10   | 0.9208  | 0.05  |
| assessment                  |           | finalexa   |          |          | -0.1727  | 0.3209         | 140 | -0.54   | 0.5914  | 0.05  |
| assessment                  |           | homework   |          |          | -0.4620  | 0.3344         | 140 | -1.38   | 0.1693  | 0.05  |
| assessment                  |           | unitexam   |          |          | 0        | .              | .   | .       | .       | .     |
| class                       |           |            | Freshman |          | 0.2193   | 0.4423         | 140 | 0.50    | 0.6208  | 0.05  |
| class                       |           |            | Junior   |          | -0.5346  | 0.4822         | 140 | -1.11   | 0.2695  | 0.05  |
| class                       |           |            | Senior   |          | -0.00539 | 0.4417         | 140 | -0.01   | 0.9903  | 0.05  |
| class                       |           |            | Sophomor |          | 0        | .              | .   | .       | .       | .     |
| major                       |           |            |          | Agricult | -0.9248  | 0.8546         | 140 | -1.08   | 0.2811  | 0.05  |
| major                       |           |            |          | Biologic | -0.7939  | 0.8265         | 140 | -0.96   | 0.3384  | 0.05  |
| major                       |           |            |          | Natural  | -0.2405  | 0.8726         | 140 | -0.28   | 0.7832  | 0.05  |
| major                       |           |            |          | Other    | -1.1560  | 0.9611         | 140 | -1.20   | 0.2311  | 0.05  |
| major                       |           |            |          | Pre-Prof | -0.3815  | 0.9389         | 140 | -0.41   | 0.6851  | 0.05  |
| major                       |           |            |          | Undeclar | 0        | .              | .   | .       | .       | .     |
| attendance                  |           |            |          |          | 2.1286   | 0.9528         | 140 | 2.23    | 0.0271  | 0.05  |

*The GLIMMIX Procedure*

| Solutions for Fixed Effects |           |            |          |          |         |        |
|-----------------------------|-----------|------------|----------|----------|---------|--------|
| Effect                      | reasoning | assessment | class    | major    | Lower   | Upper  |
| Intercept                   | Correct   |            |          |          | -2.9915 | 1.3795 |
| Intercept                   | DMixed    |            |          |          | -2.2918 | 2.0731 |
| assessment                  |           | finalexa   |          |          | -0.8071 | 0.4617 |
| assessment                  |           | homework   |          |          | -1.1232 | 0.1992 |
| assessment                  |           | unitexam   |          |          | .       | .      |
| class                       |           |            | Freshman |          | -0.6551 | 1.0937 |
| class                       |           |            | Junior   |          | -1.4880 | 0.4188 |
| class                       |           |            | Senior   |          | -0.8787 | 0.8679 |
| class                       |           |            | Sophomor |          | .       | .      |
| major                       |           |            |          | Agricult | -2.6144 | 0.7648 |
| major                       |           |            |          | Biologic | -2.4279 | 0.8401 |
| major                       |           |            |          | Natural  | -1.9658 | 1.4847 |
| major                       |           |            |          | Other    | -3.0562 | 0.7442 |
| major                       |           |            |          | Pre-Prof | -2.2377 | 1.4747 |
| major                       |           |            |          | Undeclar | .       | .      |
| attendance                  |           |            |          |          | 0.2449  | 4.0124 |

The GLIMMIX Procedure

| Odds Ratio Estimates                                                                                                                                                                                       |          |          |            |             |          |          |             |          |     |
|------------------------------------------------------------------------------------------------------------------------------------------------------------------------------------------------------------|----------|----------|------------|-------------|----------|----------|-------------|----------|-----|
| assessment                                                                                                                                                                                                 | class    | major    | attendance | _assessment | _class   | _major   | _attendance | Estimate | DF  |
| finalexa                                                                                                                                                                                                   |          |          | 0.9365     | unitexam    |          |          | 0.9365      | 0.841    | 140 |
| homework                                                                                                                                                                                                   |          |          | 0.9365     | unitexam    |          |          | 0.9365      | 0.630    | 140 |
|                                                                                                                                                                                                            | Freshman |          | 0.9365     |             | Sophomor |          | 0.9365      | 1.245    | 140 |
|                                                                                                                                                                                                            | Junior   |          | 0.9365     |             | Sophomor |          | 0.9365      | 0.586    | 140 |
|                                                                                                                                                                                                            | Senior   |          | 0.9365     |             | Sophomor |          | 0.9365      | 0.995    | 140 |
|                                                                                                                                                                                                            |          | Agricult | 0.9365     |             |          | Undeclar | 0.9365      | 0.397    | 140 |
|                                                                                                                                                                                                            |          | Biologic | 0.9365     |             |          | Undeclar | 0.9365      | 0.452    | 140 |
|                                                                                                                                                                                                            |          | Natural  | 0.9365     |             |          | Undeclar | 0.9365      | 0.786    | 140 |
|                                                                                                                                                                                                            |          | Other    | 0.9365     |             |          | Undeclar | 0.9365      | 0.315    | 140 |
|                                                                                                                                                                                                            |          | Pre-Prof | 0.9365     |             |          | Undeclar | 0.9365      | 0.683    | 140 |
|                                                                                                                                                                                                            |          |          | 1.9365     |             |          |          | 0.9365      | 8.403    | 140 |
| <b>Effects of continuous variables are assessed as one unit offsets from the mean.<br/>                     The AT suboption modifies the reference value and the UNIT suboption modifies the offsets.</b> |          |          |            |             |          |          |             |          |     |

| Odds Ratio Estimates                                                                                                                                                                                       |          |          |            |             |          |          |             |                       |        |
|------------------------------------------------------------------------------------------------------------------------------------------------------------------------------------------------------------|----------|----------|------------|-------------|----------|----------|-------------|-----------------------|--------|
| assessment                                                                                                                                                                                                 | class    | major    | attendance | _assessment | _class   | _major   | _attendance | 95% Confidence Limits |        |
| finalexa                                                                                                                                                                                                   |          |          | 0.9365     | unitexam    |          |          | 0.9365      | 0.446                 | 1.587  |
| homework                                                                                                                                                                                                   |          |          | 0.9365     | unitexam    |          |          | 0.9365      | 0.325                 | 1.220  |
|                                                                                                                                                                                                            | Freshman |          | 0.9365     |             | Sophomor |          | 0.9365      | 0.519                 | 2.985  |
|                                                                                                                                                                                                            | Junior   |          | 0.9365     |             | Sophomor |          | 0.9365      | 0.226                 | 1.520  |
|                                                                                                                                                                                                            | Senior   |          | 0.9365     |             | Sophomor |          | 0.9365      | 0.415                 | 2.382  |
|                                                                                                                                                                                                            |          | Agricult | 0.9365     |             |          | Undeclar | 0.9365      | 0.073                 | 2.149  |
|                                                                                                                                                                                                            |          | Biologic | 0.9365     |             |          | Undeclar | 0.9365      | 0.088                 | 2.317  |
|                                                                                                                                                                                                            |          | Natural  | 0.9365     |             |          | Undeclar | 0.9365      | 0.140                 | 4.414  |
|                                                                                                                                                                                                            |          | Other    | 0.9365     |             |          | Undeclar | 0.9365      | 0.047                 | 2.105  |
|                                                                                                                                                                                                            |          | Pre-Prof | 0.9365     |             |          | Undeclar | 0.9365      | 0.107                 | 4.370  |
|                                                                                                                                                                                                            |          |          | 1.9365     |             |          |          | 0.9365      | 1.277                 | 55.281 |
| <b>Effects of continuous variables are assessed as one unit offsets from the mean.<br/>                     The AT suboption modifies the reference value and the UNIT suboption modifies the offsets.</b> |          |          |            |             |          |          |             |                       |        |

*The GLIMMIX Procedure*

| <b>Type III Tests of Fixed Effects</b> |                   |                   |                |                  |
|----------------------------------------|-------------------|-------------------|----------------|------------------|
| <b>Effect</b>                          | <b>Num<br/>DF</b> | <b>Den<br/>DF</b> | <b>F Value</b> | <b>Pr &gt; F</b> |
| <b>assessment</b>                      | 2                 | 140               | 0.96           | 0.3846           |
| <b>class</b>                           | 3                 | 140               | 0.74           | 0.5319           |
| <b>major</b>                           | 5                 | 140               | 0.77           | 0.5711           |
| <b>attendance</b>                      | 1                 | 140               | 4.99           | 0.0271           |

*The GLIMMIX Procedure*

| Model Information          |             |
|----------------------------|-------------|
| Data Set                   | WORK.GROUP  |
| Response Variable          | answer      |
| Response Distribution      | Binary      |
| Link Function              | Logit       |
| Variance Function          | Default     |
| Variance Matrix Blocked By | id          |
| Estimation Technique       | Residual PL |
| Degrees of Freedom Method  | Containment |

| Class Level Information |        |                         |
|-------------------------|--------|-------------------------|
| Class                   | Levels | Values                  |
| assessment              | 2      | homework unitexam       |
| reasoning               | 3      | Correct DMixed Incorrec |

|                             |    |
|-----------------------------|----|
| Number of Observations Read | 47 |
| Number of Observations Used | 47 |

| Response Profile                                                         |          |                 |
|--------------------------------------------------------------------------|----------|-----------------|
| Ordered Value                                                            | answer   | Total Frequency |
| 1                                                                        | Correct  | 18              |
| 2                                                                        | Incorrec | 29              |
| The GLIMMIX procedure is modeling the probability that answer='Correct'. |          |                 |

| Dimensions               |    |
|--------------------------|----|
| G-side Cov. Parameters   | 1  |
| Columns in X             | 6  |
| Columns in Z per Subject | 1  |
| Subjects (Blocks in V)   | 24 |
| Max Obs per Subject      | 2  |

*The GLIMMIX Procedure*

| Optimization Information   |                             |
|----------------------------|-----------------------------|
| Optimization Technique     | Newton-Raphson with Ridging |
| Parameters in Optimization | 1                           |
| Lower Boundaries           | 1                           |
| Upper Boundaries           | 0                           |
| Fixed Effects              | Profiled                    |
| Starting From              | Data                        |

| Iteration History |          |               |                    |            |              |
|-------------------|----------|---------------|--------------------|------------|--------------|
| Iteration         | Restarts | Subiterations | Objective Function | Change     | Max Gradient |
| 0                 | 0        | 1             | 213.81673887       | 2.00000000 | 0.371637     |
| 1                 | 0        | 3             | 238.81277454       | 2.00000000 | 4.397E-6     |
| 2                 | 0        | 3             | 232.47559505       | 0.47214154 | 3.415E-8     |
| 3                 | 0        | 2             | 229.84900721       | 0.12388102 | 2.574E-6     |
| 4                 | 0        | 2             | 229.34598259       | 0.04189164 | 4.428E-8     |
| 5                 | 0        | 2             | 229.14945269       | 0.01108366 | 2.38E-10     |
| 6                 | 0        | 1             | 229.09702361       | 0.00280908 | 1.169E-6     |
| 7                 | 0        | 1             | 229.08337662       | 0.00068321 | 6.931E-8     |
| 8                 | 0        | 1             | 229.08002982       | 0.00016338 | 3.965E-9     |
| 9                 | 0        | 1             | 229.07922761       | 0.00003888 | 2.25E-10     |
| 10                | 0        | 0             | 229.07903656       | 0.00000000 | 4.142E-6     |

Convergence criterion (PCONV=1.11022E-8) satisfied.

| Fit Statistics               |        |
|------------------------------|--------|
| -2 Res Log Pseudo-Likelihood | 229.08 |
| Generalized Chi-Square       | 30.18  |
| Gener. Chi-Square / DF       | 0.70   |

| Covariance Parameter Estimates |         |          |                |
|--------------------------------|---------|----------|----------------|
| Cov Parm                       | Subject | Estimate | Standard Error |
| Intercept                      | id      | 0.9548   | 2.0644         |



The GLIMMIX Procedure

| Solutions for Fixed Effects |            |           |          |                |    |         |         |       |         |        |
|-----------------------------|------------|-----------|----------|----------------|----|---------|---------|-------|---------|--------|
| Effect                      | assessment | reasoning | Estimate | Standard Error | DF | t Value | Pr >  t | Alpha | Lower   | Upper  |
| Intercept                   |            |           | -0.9986  | 1.2177         | 23 | -0.82   | 0.4206  | 0.05  | -3.5176 | 1.5205 |
| reasoning                   |            | Correct   | 3.1474   | 1.3776         | 20 | 2.28    | 0.0334  | 0.05  | 0.2739  | 6.0210 |
| reasoning                   |            | DMixed    | 0.9271   | 1.4393         | 20 | 0.64    | 0.5268  | 0.05  | -2.0752 | 3.9293 |
| reasoning                   |            | Incorrec  | 0        | .              | .  | .       | .       | .     | .       | .      |
| assessment                  | homework   |           | -1.8081  | 1.2547         | 20 | -1.44   | 0.1650  | 0.05  | -4.4253 | 0.8091 |
| assessment                  | unitexam   |           | 0        | .              | .  | .       | .       | .     | .       | .      |

| Odds Ratio Estimates |           |             |            |          |    |                       |         |
|----------------------|-----------|-------------|------------|----------|----|-----------------------|---------|
| assessment           | reasoning | _assessment | _reasoning | Estimate | DF | 95% Confidence Limits |         |
|                      | Correct   |             | Incorrec   | 23.276   | 20 | 1.315                 | 411.983 |
|                      | DMixed    |             | Incorrec   | 2.527    | 20 | 0.126                 | 50.873  |
| homework             |           | unitexam    |            | 0.164    | 20 | 0.012                 | 2.246   |

| Type III Tests of Fixed Effects |        |        |         |        |
|---------------------------------|--------|--------|---------|--------|
| Effect                          | Num DF | Den DF | F Value | Pr > F |
| reasoning                       | 2      | 20     | 3.09    | 0.0679 |
| assessment                      | 1      | 20     | 2.08    | 0.1650 |

| Estimates        |          |                |    |         |         |       |         |        |                        |
|------------------|----------|----------------|----|---------|---------|-------|---------|--------|------------------------|
| Label            | Estimate | Standard Error | DF | t Value | Pr >  t | Alpha | Lower   | Upper  | Exponentiated Estimate |
| correct vs mixed | 2.2203   | 1.2324         | 20 | 1.80    | 0.0867  | 0.05  | -0.3504 | 4.7911 | 9.2105                 |

| Estimates        |                     |                     |
|------------------|---------------------|---------------------|
| Label            | Exponentiated Lower | Exponentiated Upper |
| correct vs mixed | 0.7044              | 120.43              |

**The GLIMMIX Procedure**

| Model Information          |              |
|----------------------------|--------------|
| Data Set                   | WORK.STUDENT |
| Response Variable          | answer       |
| Response Distribution      | Binary       |
| Link Function              | Logit        |
| Variance Function          | Default      |
| Variance Matrix Blocked By | id           |
| Estimation Technique       | Residual PL  |
| Degrees of Freedom Method  | Containment  |

| Class Level Information |        |                                                   |
|-------------------------|--------|---------------------------------------------------|
| Class                   | Levels | Values                                            |
| assessment              | 3      | finalexa homework unitexam                        |
| reasoning               | 3      | Correct DMixed Incorrec                           |
| class                   | 4      | Freshman Junior Senior Sophomor                   |
| major                   | 6      | Agricult Biologic Natural Other Pre-Prof Undeclar |

|                             |     |
|-----------------------------|-----|
| Number of Observations Read | 231 |
| Number of Observations Used | 231 |

| Response Profile                                                         |          |                 |
|--------------------------------------------------------------------------|----------|-----------------|
| Ordered Value                                                            | answer   | Total Frequency |
| 1                                                                        | Correct  | 156             |
| 2                                                                        | Incorrec | 75              |
| The GLIMMIX procedure is modeling the probability that answer='Correct'. |          |                 |

| Dimensions               |    |
|--------------------------|----|
| G-side Cov. Parameters   | 1  |
| Columns in X             | 18 |
| Columns in Z per Subject | 1  |
| Subjects (Blocks in V)   | 88 |
| Max Obs per Subject      | 3  |

*The GLIMMIX Procedure*

| Optimization Information   |                             |
|----------------------------|-----------------------------|
| Optimization Technique     | Newton-Raphson with Ridging |
| Parameters in Optimization | 1                           |
| Lower Boundaries           | 1                           |
| Upper Boundaries           | 0                           |
| Fixed Effects              | Profiled                    |
| Starting From              | Data                        |

| Iteration History |          |               |                    |            |              |
|-------------------|----------|---------------|--------------------|------------|--------------|
| Iteration         | Restarts | Subiterations | Objective Function | Change     | Max Gradient |
| 0                 | 0        | 3             | 1001.4839014       | 0.63939608 | 9.42E-11     |
| 1                 | 0        | 4             | 1119.7943116       | 1.09341653 | 5.458E-7     |
| 2                 | 0        | 4             | 1197.9351458       | 0.48680475 | 3.231E-9     |
| 3                 | 0        | 3             | 1245.7517733       | 0.20024928 | 6.711E-7     |
| 4                 | 0        | 3             | 1266.3734522       | 0.07396460 | 4.63E-10     |
| 5                 | 0        | 2             | 1273.2000182       | 0.02384039 | 6.628E-7     |
| 6                 | 0        | 2             | 1275.2571053       | 0.00715821 | 5.612E-9     |
| 7                 | 0        | 2             | 1275.8587          | 0.00208978 | 4.13E-11     |
| 8                 | 0        | 1             | 1276.0328051       | 0.00060417 | 1.34E-6      |
| 9                 | 0        | 1             | 1276.0830059       | 0.00017451 | 1.118E-7     |
| 10                | 0        | 1             | 1276.0974951       | 0.00005031 | 9.291E-9     |
| 11                | 0        | 1             | 1276.1016715       | 0.00001450 | 7.71E-10     |
| 12                | 0        | 1             | 1276.1028749       | 0.00000418 | 6.4E-11      |
| 13                | 0        | 0             | 1276.1032216       | 0.00000000 | 5.736E-6     |

Convergence criterion (PCONV=1.11022E-8) satisfied.

| Fit Statistics               |         |
|------------------------------|---------|
| -2 Res Log Pseudo-Likelihood | 1276.10 |
| Generalized Chi-Square       | 96.32   |
| Gener. Chi-Square / DF       | 0.44    |

*The GLIMMIX Procedure*

| Covariance Parameter Estimates |         |          |                |
|--------------------------------|---------|----------|----------------|
| Cov Parm                       | Subject | Estimate | Standard Error |
| Intercept                      | id      | 2.0784   | 0.9338         |

## The GLIMMIX Procedure

| Solutions for Fixed Effects |            |           |          |          |          |                |     |         |         |       |
|-----------------------------|------------|-----------|----------|----------|----------|----------------|-----|---------|---------|-------|
| Effect                      | assessment | reasoning | class    | major    | Estimate | Standard Error | DF  | t Value | Pr >  t | Alpha |
| Intercept                   |            |           |          |          | -2.2108  | 1.8629         | 78  | -1.19   | 0.2389  | 0.05  |
| assessment                  | finalex    |           |          |          | -5.0182  | 0.8522         | 139 | -5.89   | <.0001  | 0.05  |
| assessment                  | homework   |           |          |          | -4.6375  | 0.8699         | 139 | -5.33   | <.0001  | 0.05  |
| assessment                  | unitexam   |           |          |          | 0        | .              | .   | .       | .       | .     |
| reasoning                   |            | Correct   |          |          | 3.0645   | 0.5982         | 139 | 5.12    | <.0001  | 0.05  |
| reasoning                   |            | DMixed    |          |          | 1.1008   | 0.8554         | 139 | 1.29    | 0.2003  | 0.05  |
| reasoning                   |            | Incorrec  |          |          | 0        | .              | .   | .       | .       | .     |
| class                       |            |           | Freshman |          | -0.4665  | 0.7435         | 139 | -0.63   | 0.5314  | 0.05  |
| class                       |            |           | Junior   |          | -0.5839  | 0.8643         | 139 | -0.68   | 0.5004  | 0.05  |
| class                       |            |           | Senior   |          | 0.4084   | 0.7405         | 139 | 0.55    | 0.5822  | 0.05  |
| class                       |            |           | Sophomor |          | 0        | .              | .   | .       | .       | .     |
| major                       |            |           |          | Agricult | 2.6234   | 1.4489         | 139 | 1.81    | 0.0724  | 0.05  |
| major                       |            |           |          | Biologic | 2.1208   | 1.3769         | 139 | 1.54    | 0.1258  | 0.05  |
| major                       |            |           |          | Natural  | 2.9344   | 1.4558         | 139 | 2.02    | 0.0458  | 0.05  |
| major                       |            |           |          | Other    | 3.4381   | 1.6781         | 139 | 2.05    | 0.0424  | 0.05  |
| major                       |            |           |          | Pre-Prof | 3.4190   | 1.6524         | 139 | 2.07    | 0.0404  | 0.05  |
| major                       |            |           |          | Undeclar | 0        | .              | .   | .       | .       | .     |
| attendance                  |            |           |          |          | 2.8275   | 1.5906         | 139 | 1.78    | 0.0777  | 0.05  |

*The GLIMMIX Procedure*

| Solutions for Fixed Effects |            |           |          |          |         |         |
|-----------------------------|------------|-----------|----------|----------|---------|---------|
| Effect                      | assessment | reasoning | class    | major    | Lower   | Upper   |
| <b>Intercept</b>            |            |           |          |          | -5.9194 | 1.4979  |
| <b>assessment</b>           | finalexa   |           |          |          | -6.7031 | -3.3333 |
| <b>assessment</b>           | homework   |           |          |          | -6.3574 | -2.9176 |
| <b>assessment</b>           | unitexam   |           |          |          | .       | .       |
| <b>reasoning</b>            |            | Correct   |          |          | 1.8817  | 4.2473  |
| <b>reasoning</b>            |            | DMixed    |          |          | -0.5904 | 2.7921  |
| <b>reasoning</b>            |            | Incorrec  |          |          | .       | .       |
| <b>class</b>                |            |           | Freshman |          | -1.9366 | 1.0035  |
| <b>class</b>                |            |           | Junior   |          | -2.2927 | 1.1249  |
| <b>class</b>                |            |           | Senior   |          | -1.0557 | 1.8726  |
| <b>class</b>                |            |           | Sophomor |          | .       | .       |
| <b>major</b>                |            |           |          | Agricult | -0.2413 | 5.4881  |
| <b>major</b>                |            |           |          | Biologic | -0.6015 | 4.8432  |
| <b>major</b>                |            |           |          | Natural  | 0.05601 | 5.8127  |
| <b>major</b>                |            |           |          | Other    | 0.1201  | 6.7560  |
| <b>major</b>                |            |           |          | Pre-Prof | 0.1520  | 6.6861  |
| <b>major</b>                |            |           |          | Undeclar | .       | .       |
| <b>attendance</b>           |            |           |          |          | -0.3174 | 5.9724  |

*The GLIMMIX Procedure*

**Odds Ratio Estimates**

| <b>assessment</b> | <b>reasoning</b> | <b>class</b> | <b>major</b> | <b>attendance</b> | <b>_assessment</b> | <b>_reasoning</b> | <b>_class</b> | <b>_major</b> | <b>_attendance</b> |
|-------------------|------------------|--------------|--------------|-------------------|--------------------|-------------------|---------------|---------------|--------------------|
| finalex           |                  |              |              | 0.9365            | unitexam           |                   |               |               | 0.9365             |
| homework          |                  |              |              | 0.9365            | unitexam           |                   |               |               | 0.9365             |
|                   | Correct          |              |              | 0.9365            |                    | Incorrec          |               |               | 0.9365             |
|                   | DMixed           |              |              | 0.9365            |                    | Incorrec          |               |               | 0.9365             |
|                   |                  | Freshman     |              | 0.9365            |                    |                   | Sophomor      |               | 0.9365             |
|                   |                  | Junior       |              | 0.9365            |                    |                   | Sophomor      |               | 0.9365             |
|                   |                  | Senior       |              | 0.9365            |                    |                   | Sophomor      |               | 0.9365             |
|                   |                  |              | Agricult     | 0.9365            |                    |                   |               | Undeclar      | 0.9365             |
|                   |                  |              | Biologic     | 0.9365            |                    |                   |               | Undeclar      | 0.9365             |
|                   |                  |              | Natural      | 0.9365            |                    |                   |               | Undeclar      | 0.9365             |
|                   |                  |              | Other        | 0.9365            |                    |                   |               | Undeclar      | 0.9365             |
|                   |                  |              | Pre-Prof     | 0.9365            |                    |                   |               | Undeclar      | 0.9365             |
|                   |                  |              |              | 1.9365            |                    |                   |               |               | 0.9365             |

**Effects of continuous variables are assessed as one unit offsets from the mean.  
 The AT suboption modifies the reference value and the UNIT suboption modifies the offsets.**

*The GLIMMIX Procedure*

| Odds Ratio Estimates |           |          |          |            |             |            |          |          |          |     |
|----------------------|-----------|----------|----------|------------|-------------|------------|----------|----------|----------|-----|
| assessment           | reasoning | class    | major    | attendance | _assessment | _reasoning | _class   | _major   | Estimate | DF  |
| finalexa             |           |          |          | 0.9365     | unitexam    |            |          |          | 0.007    | 139 |
| homework             |           |          |          | 0.9365     | unitexam    |            |          |          | 0.010    | 139 |
|                      | Correct   |          |          | 0.9365     |             | Incorrec   |          |          | 21.423   | 139 |
|                      | DMixed    |          |          | 0.9365     |             | Incorrec   |          |          | 3.007    | 139 |
|                      |           | Freshman |          | 0.9365     |             |            | Sophomor |          | 0.627    | 139 |
|                      |           | Junior   |          | 0.9365     |             |            | Sophomor |          | 0.558    | 139 |
|                      |           | Senior   |          | 0.9365     |             |            | Sophomor |          | 1.504    | 139 |
|                      |           |          | Agricult | 0.9365     |             |            |          | Undeclar | 13.782   | 139 |
|                      |           |          | Biologic | 0.9365     |             |            |          | Undeclar | 8.338    | 139 |
|                      |           |          | Natural  | 0.9365     |             |            |          | Undeclar | 18.809   | 139 |
|                      |           |          | Other    | 0.9365     |             |            |          | Undeclar | 31.126   | 139 |
|                      |           |          | Pre-Prof | 0.9365     |             |            |          | Undeclar | 30.540   | 139 |
|                      |           |          |          | 1.9365     |             |            |          |          | 16.903   | 139 |

Effects of continuous variables are assessed as one unit offsets from the mean.  
 The AT suboption modifies the reference value and the UNIT suboption modifies the offsets.



*The GLIMMIX Procedure*

| Odds Ratio Estimates |           |          |          |            |             |            |          |          |                       |         |
|----------------------|-----------|----------|----------|------------|-------------|------------|----------|----------|-----------------------|---------|
| assessment           | reasoning | class    | major    | attendance | _assessment | _reasoning | _class   | _major   | 95% Confidence Limits |         |
| finalexa             |           |          |          | 0.9365     | unitexam    |            |          |          | 0.001                 | 0.036   |
| homework             |           |          |          | 0.9365     | unitexam    |            |          |          | 0.002                 | 0.054   |
|                      | Correct   |          |          | 0.9365     |             | Incorrec   |          |          | 6.564                 | 69.918  |
|                      | DMixed    |          |          | 0.9365     |             | Incorrec   |          |          | 0.554                 | 16.316  |
|                      |           | Freshman |          | 0.9365     |             |            | Sophomor |          | 0.144                 | 2.728   |
|                      |           | Junior   |          | 0.9365     |             |            | Sophomor |          | 0.101                 | 3.080   |
|                      |           | Senior   |          | 0.9365     |             |            | Sophomor |          | 0.348                 | 6.505   |
|                      |           |          | Agricult | 0.9365     |             |            |          | Undeclar | 0.786                 | 241.787 |
|                      |           |          | Biologic | 0.9365     |             |            |          | Undeclar | 0.548                 | 126.870 |
|                      |           |          | Natural  | 0.9365     |             |            |          | Undeclar | 1.058                 | 334.520 |
|                      |           |          | Other    | 0.9365     |             |            |          | Undeclar | 1.128                 | 859.171 |
|                      |           |          | Pre-Prof | 0.9365     |             |            |          | Undeclar | 1.164                 | 801.162 |
|                      |           |          |          | 1.9365     |             |            |          |          | 0.728                 | 392.438 |

Effects of continuous variables are assessed as one unit offsets from the mean.  
 The AT suboption modifies the reference value and the UNIT suboption modifies the offsets.

| Type III Tests of Fixed Effects |        |        |         |        |
|---------------------------------|--------|--------|---------|--------|
| Effect                          | Num DF | Den DF | F Value | Pr > F |
| assessment                      | 2      | 139    | 17.53   | <.0001 |
| reasoning                       | 2      | 139    | 13.93   | <.0001 |
| class                           | 3      | 139    | 0.60    | 0.6137 |
| major                           | 5      | 139    | 1.22    | 0.3048 |
| attendance                      | 1      | 139    | 3.16    | 0.0777 |

*The GLIMMIX Procedure*

| Estimates                          |          |                |     |         |         |       |         |        |                        |
|------------------------------------|----------|----------------|-----|---------|---------|-------|---------|--------|------------------------|
| Label                              | Estimate | Standard Error | DF  | t Value | Pr >  t | Alpha | Lower   | Upper  | Exponentiated Estimate |
| <b>reasoning: correct vs mixed</b> | 1.9636   | 0.7798         | 139 | 2.52    | 0.0129  | 0.05  | 0.4219  | 3.5053 | 7.1252                 |
| <b>assessment: final-review</b>    | -0.3807  | 0.4711         | 139 | -0.81   | 0.4204  | 0.05  | -1.3122 | 0.5508 | 0.6834                 |

| Estimates                          |                     |                     |
|------------------------------------|---------------------|---------------------|
| Label                              | Exponentiated Lower | Exponentiated Upper |
| <b>reasoning: correct vs mixed</b> | 1.5249              | 33.2931             |
| <b>assessment: final-review</b>    | 0.2692              | 1.7347              |
